# Supplementary material for: BIG BROTHER Uncouples Cell Proliferation from Elongation in the Arabidopsis Primary Root
Source: PubMed Central journal article supplement — Plant Cell Physiol. 2017 Jun 30;58(9):1519–27. doi: 10.1093/pcp/pcx091 (PMC5914324; doi:10.1093/pcp/pcx091), 2017-06-30
Supplement: pcx091_supplementary_pcp-2017-e-00147-file007.pdf [file pcx091_supplementary_pcp-2017-e-00147-file007.pdf]

Figure S1

**A**

| observed | F2 <i>bb-2</i> x <i>brx-2</i> |       |                  |
|----------|-------------------------------|-------|------------------|
| long     | short                         | total | Chi <sup>2</sup> |
| 47       | 121                           | 168   | 0.794            |
| expected |                               |       | p value          |
| 42       | 126                           | 168   | 0.373            |

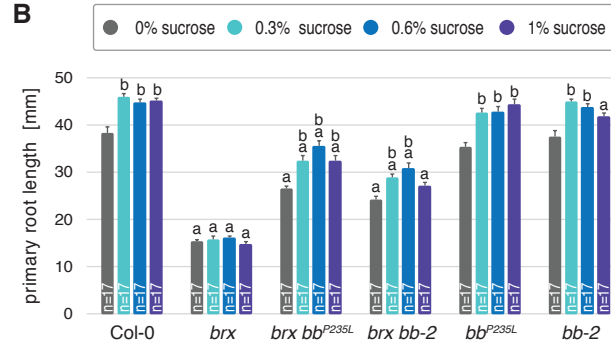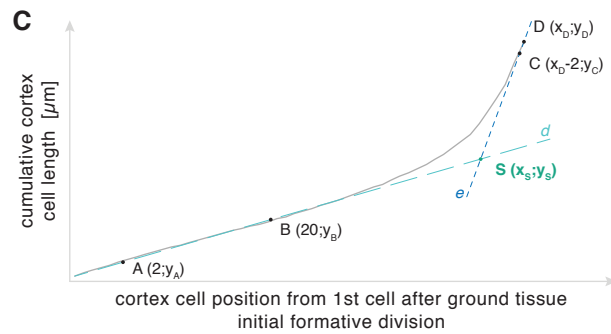

Linear functions describing *differentiation* (*d*) and *elongation* (*e*) are:

$$e: y = \frac{(y_B - y_A)}{(20 - 2)} x + \frac{20y_A - 2y_B}{(20 - 2)}$$

$$d: y = \frac{(y_D - y_C)}{(x_D - (x_D - 2))} x + \frac{x_D y_C - (x_D - 2)y_D}{(x_D - (x_D - 2))}$$

The switching point S (x<sub>s</sub>; y<sub>s</sub>) is given by solving the system:

$$\begin{cases} y = \frac{(y_B - y_A)}{(20 - 2)} x + \frac{20y_A - 2y_B}{(20 - 2)} \\ y = \frac{(y_D - y_C)}{(x_D - (x_D - 2))} x + \frac{x_D y_C - (x_D - 2)y_D}{(x_D - (x_D - 2))} \end{cases} \quad \begin{cases} x = x_s \\ y = y_s \end{cases}$$
